# Supplementary material for: Analytical Method Development and Chemometric Approach for Evidencing Presence of Plasticizer Residues in Nectar Honey Samples
Source: PubMed Central journal article supplement (PMC7084514; doi:10.3390/ijerph17051692), 2020-03-05
Supplement: ijerph-17-01692-s001.pdf [file ijerph-17-01692-s001.pdf]

# Analytical Method Development and Chemometric Approach for Evidencing Presence of Plasticizer Residues in Nectar Honey Samples

Ivan Notardonato <sup>1</sup>, Sergio Passarella <sup>1</sup>, Giuseppe Ianiri <sup>1</sup>, Cristina Di Fiore <sup>1</sup>, Mario Vincenzo Russo <sup>1</sup> and Pasquale Avino <sup>1,\*</sup>

<sup>1</sup> Department of Agriculture, Environmental and Food Sciences, University of Molise, via De Sanctis, I-86100 Campobasso, Italy; ivan.notardonato@unimol.it (I.N.); sergio.passarella@studenti.unimol.it (S.P.); g.ianiri@studenti.unimol.it (G.I.); c.difiore@studenti.unimol.it (C.D.F.); mvrusso@unimol.it (M.V.R.)

\* Correspondence: avino@unimol.it; Tel.: +39-0874-404-631

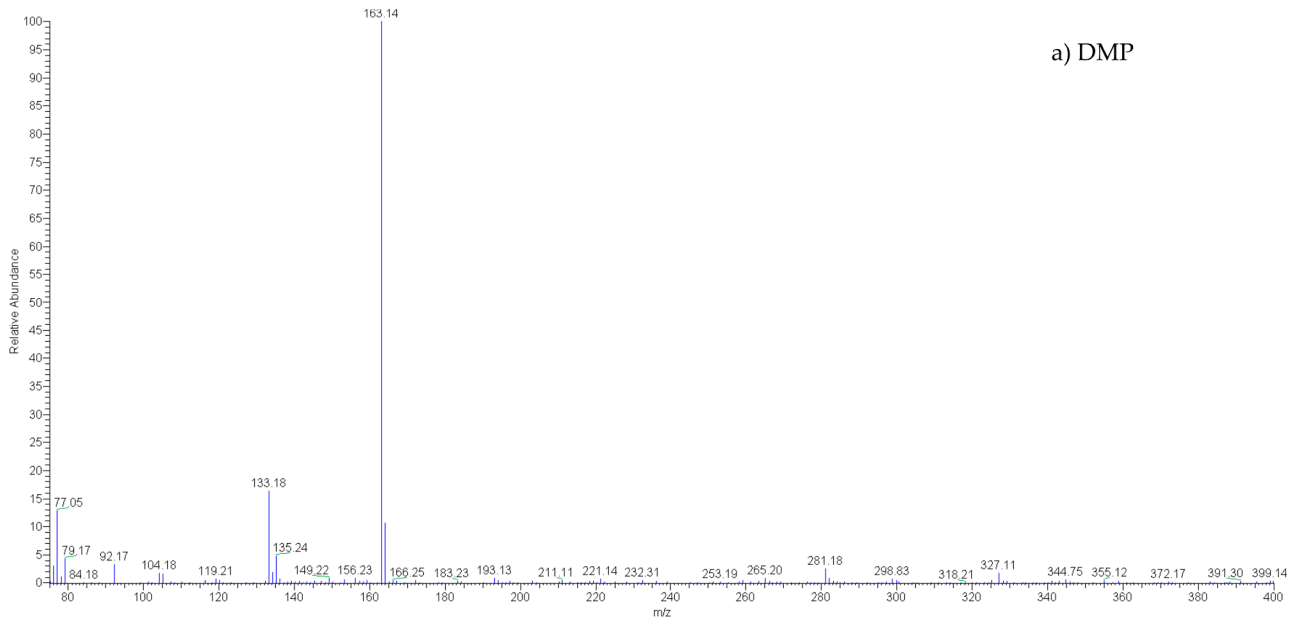

a) DMP

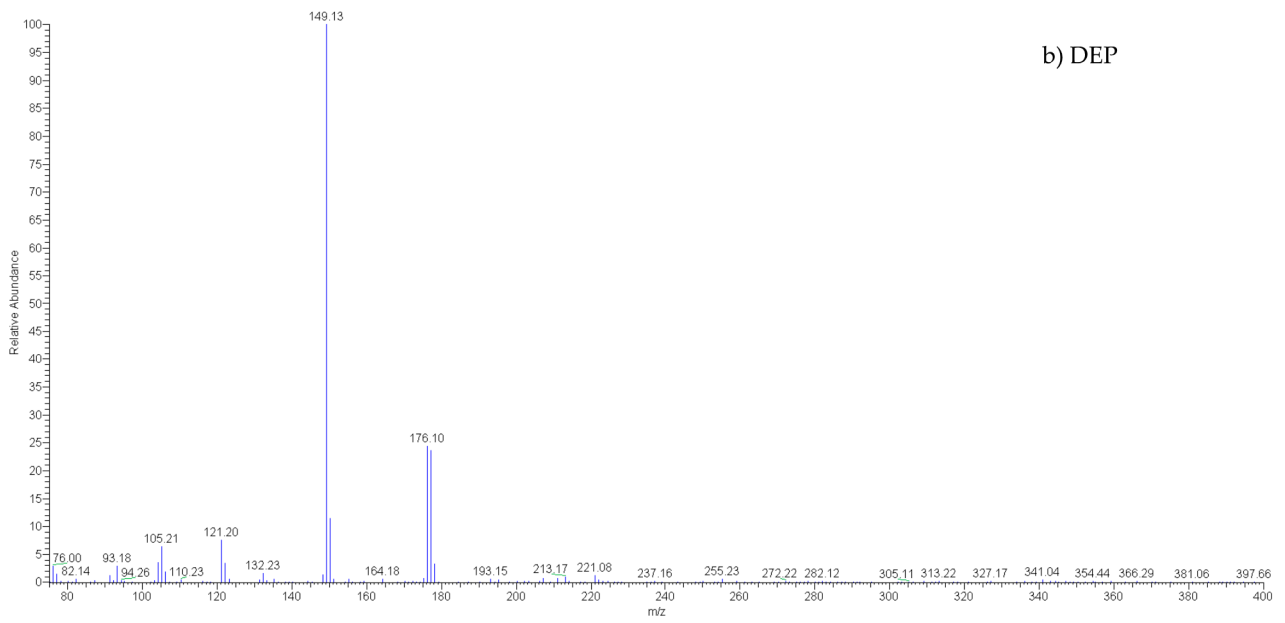

b) DEP

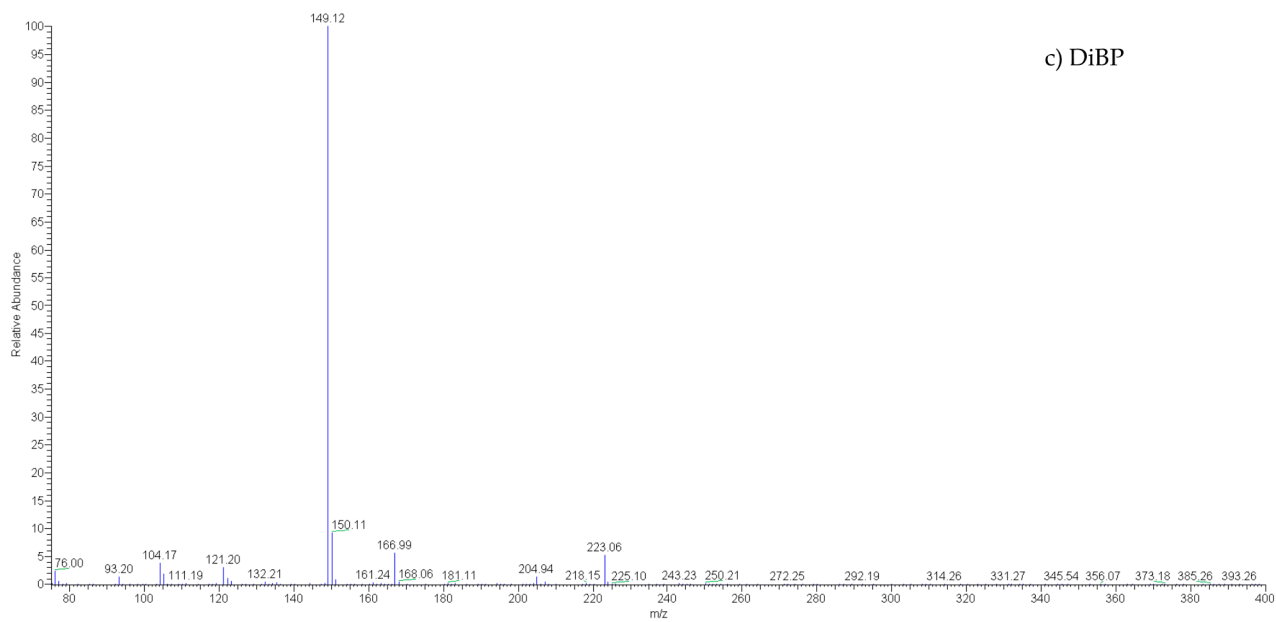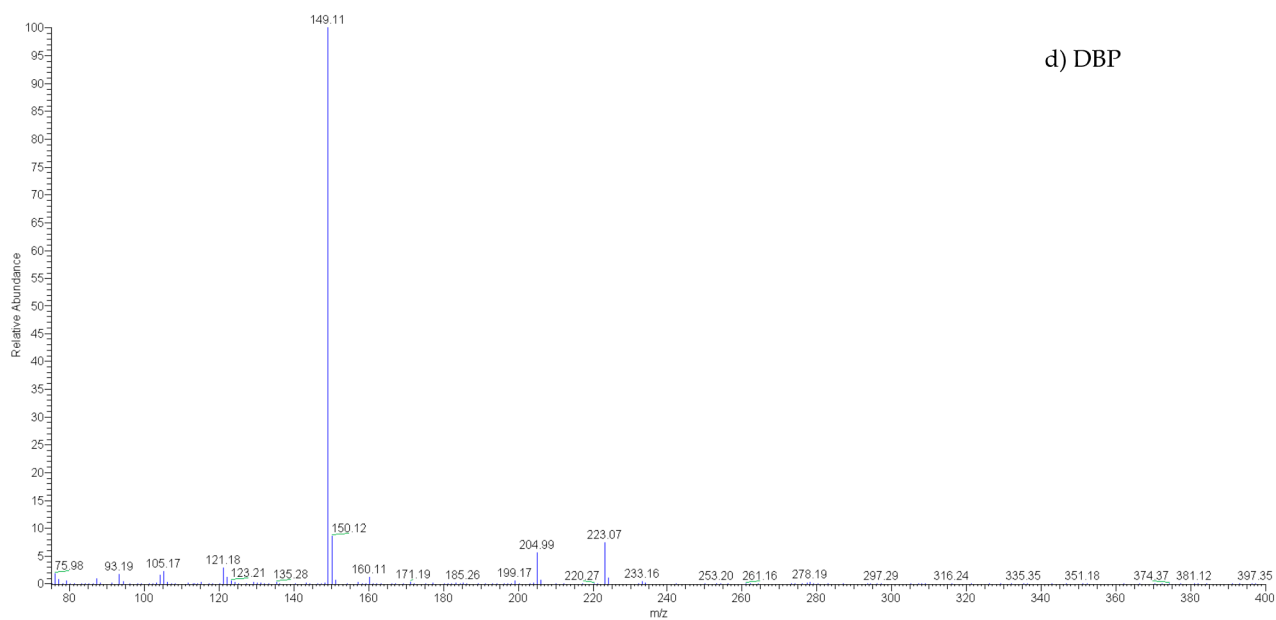

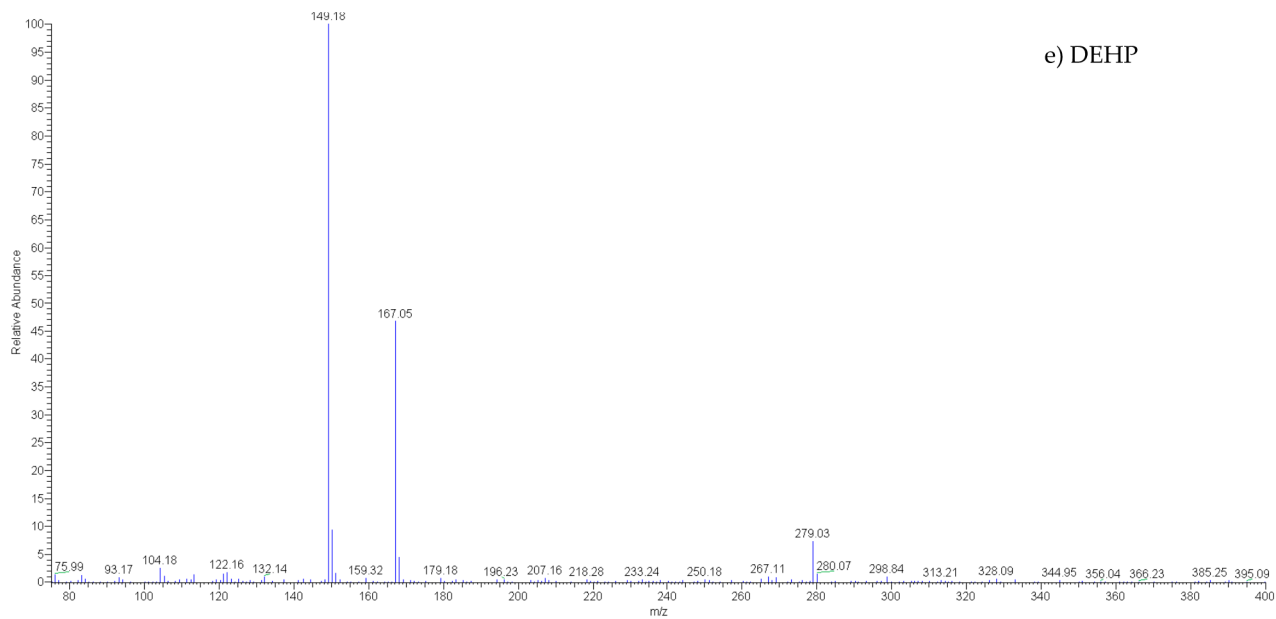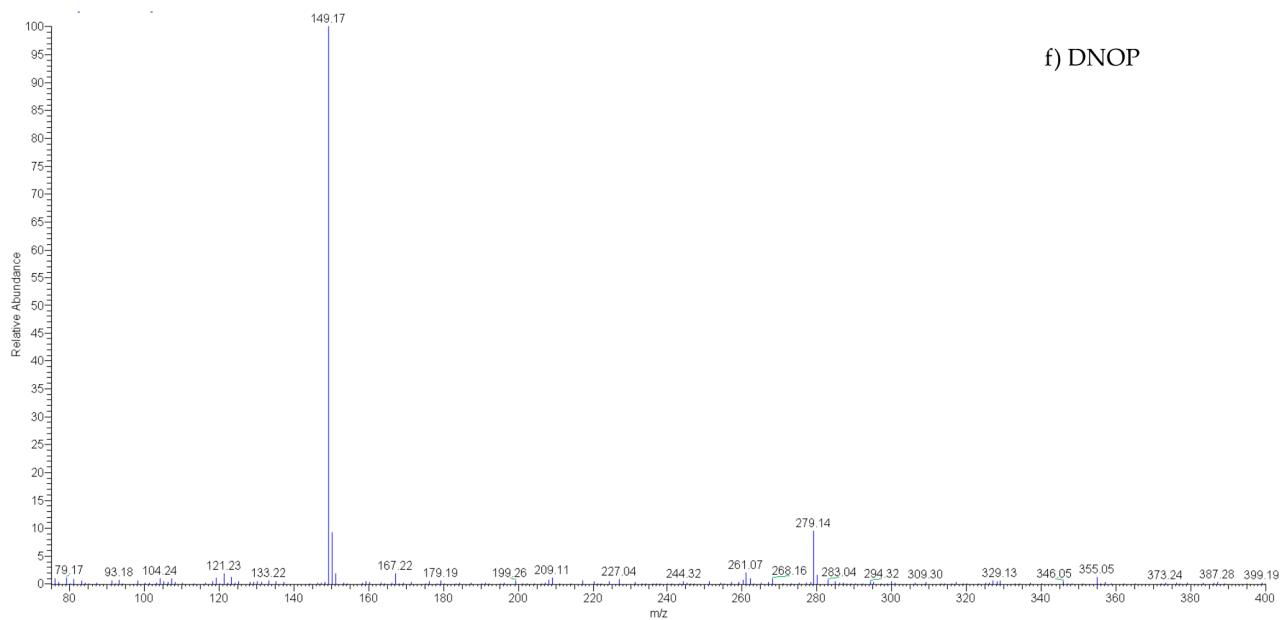

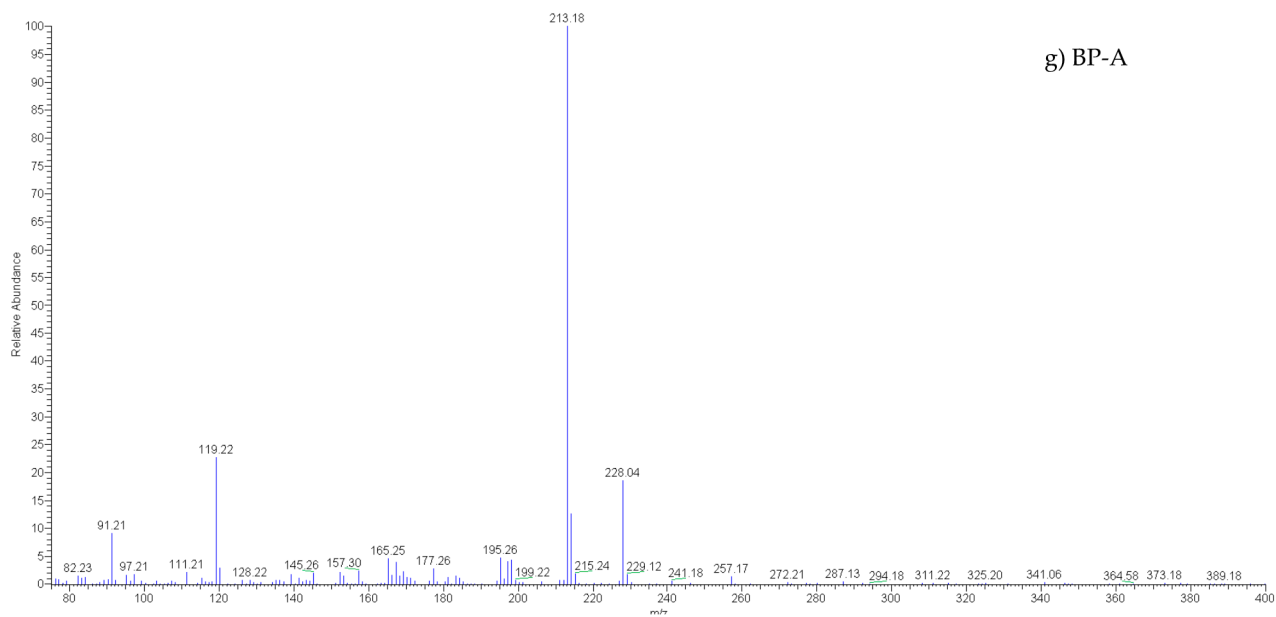

Figure S1. Mass spectra of (a) DMP, (b) DEP, (c) DiBP, (d) DBP, (e) DEHP, (f) DNOP and (g) BP-A.
